# Supplementary material for: Metallic Co2P ultrathin nanowires distinguished from CoP as robust electrocatalysts for overall water-splitting
Source: Royal Society of Chemistry journal article supplement (doi:10.1039/c5gc02462e), 2015-12-22
Supplement: c5gc02462e1.pdf [file c5gc02462e1.pdf]

## Electronic Supplementary Information

### Metallic Co<sub>2</sub>P Ultrathin Nanowires Distinguished From CoP as Robust Electrocatalysts for Overall Water-Splitting

*Zhaoyu Jin, Panpan Li and Dan Xiao\**

#### Experimental Section

**Synthesis of Co<sub>2</sub>P NWs.** The CPNWs were prepared according to a facile decomposition of Co - tri-n-octylphosphine method but with some modifications.<sup>1-3</sup> A mixture of 1.5 mmol cobalt (II) acetylacetonate (Sigma-Aldrich), 4.5 mmol oleic acid (Aladdin) and 5-mL trioctylphosphine (Alfa Aesar) was heated to 120 °C under magnetic stirring with nitrogen protecting in Schlenk line. After complete removal of water via vacuum-nitrogen cycles in the mixed solution, the precursor was sealed into a thick-walled pressure flask and rapidly microwave-heated for ~ 15 min (700 W output power) at above 350 °C. The black precipitate was produced in the bottom then centrifuged and washed by ethanol and hexane for three times after cooled to the room-temperature. Afterwards, the surfactant on the cobalt phosphide was removed by annealing at 400 °C under the protection of nitrogen/hydrogen. The sample was finally dried in the vacuum at ~ 60 °C overnight. As for the bulk Co-P film, a smooth pure cobalt foil was used as the cobalt source and the other condition and method were the same as the preparation of Co<sub>2</sub>P NWs.

**Synthesis of CoP NWs.** The method to obtain CoP nanowires was followed the reference<sup>2</sup> and described briefly below: Firstly, 1.5 mmol cobalt (II) acetylacetonate (Sigma-Aldrich), 4.5 mmol oleic acid (Aladdin) and 5-mL trioctylphosphine (Alfa Aesar) were added to a 50 mL Schlenk flask. Then the mixture was heated to 100 °C and pumped the water by the vacuum. Afterwards, the temperature was increased to 380 °C under nitrogen gas with a rate of 10 °C min<sup>-1</sup>. As soon as the black powder generated from the violet solution, we maintained the temperature for ~2 h until the Co<sub>2</sub>P was fully transfer to CoP. Finally, the product was centrifuged by ethanol and hexane for three times and the surfactant was removed through the above annealing method.

**Characterizations.** Scanning electron microscopy (SEM) analysis was carried out on a field emission Hitachi S4800 microscope (Japan). The energy-dispersive X-ray analysis (EDX) was determined by a EDAX detector (USA). The high-resolution transmission electron microscopy (HRTEM) images were recorded by a FEI Tecnai G2 F20 S (USA) with an accelerating voltage of 200 kV. X-ray diffraction (XRD) analysis was performed on a Fangyuan DX-1000 powder X-ray diffractometer (China) with Cu Ka radiation at 40 kV. X-ray photoelectron spectra (XPS) were acquired with Kratos AXIS ULTRA DLD Photoelectron Spectroscopy (UK) with element carbon as internal standard.

**Electrochemical measurements.** Catalyst inks for electrochemical testing were prepared by adding 2 mg catalyst powders to a mixture of 500  $\mu\text{L}$  distilled water / isopropyl alcohol (3:1, v/v) and 10  $\mu\text{L}$  Nafion solution (5% wt, Dupont, USA). After ultrasonical dispersion to homogeneous, 2  $\mu\text{L}$  fresh catalyst ink were cast onto a glassy carbon (GC) with a mass loading of 170  $\mu\text{g cm}^{-2}$  and dried at the room-temperature. All electrochemical tests were carried out on a computer-controlled Autolab PGSTAT 12 potentiostat / galvanostat (Metrohm, Switzerland) in 0.5 M  $\text{H}_2\text{SO}_4$  or 1.0 M KOH with Ag/AgCl as reference electrode and platinum foil as counter electrode. The data were calibrated to the reversible hydrogen electrode (RHE) obtained from the calibration equation:  $E(\text{RHE}) = -0.059 \times \text{pH} + 0.197 + E(\text{Ag/AgCl}) - iR$ . The  $iR$  drop of all polarization curves was determined by the equivalent circuits fitted from the electrochemical impedance spectra (EIS), which give the solution resistance of 1.5 ohm and 1.2 ohm for 1.0 M KOH and 0.5 M  $\text{H}_2\text{SO}_4$ , respectively. The linear sweep voltametric (LSV) curves were obtained by sweeping the potential at a low scan rate of 5  $\text{mV s}^{-1}$ , while the solution was stirred with a magnetic stir bar. Cyclic voltametric (CV) curves were controlled the scan rate at 20  $\text{mV s}^{-1}$ . Moreover, regarding the alkaline water electrolysis with the two-electrode configuration, the catalyst inks were prepared by adding 8 mg catalyst powders to a mixture of 1 mg acetylene black and 1 mg polyvinylidene fluoride. After dissolved and grinded completely into a homogeneous state, the inks were then dropped on a clean nickel foam with a mass loading of 2  $\text{mg cm}^{-2}$ . The electrode was dried at the room-temperature for 3 hours and at 80  $^\circ\text{C}$  in the vacuum for 30 min before used.

**Calculation of density of states (DOS).** The density function theory (DFT) calculations were performed through the Cambridge serial total package (CASTEP).<sup>4</sup> The generalized-gradient approximation (GGA) in the Perdew–Burke–Ernzerhof (PBE) form with a cutoff for the plane waves of 340 eV was employed. We used  $3 \times 1 \times 1$  unit cells of  $\text{Co}_2\text{P}$  and  $\text{CoP}$  for geometric optimization. The k- points grid of  $5 \times 1 \times 1$  was used for calculating the densities of states and the thickness of vacuum space was set to be 15 Å.

**Characterizations of the Co<sub>2</sub>P and CoP nanowires:**

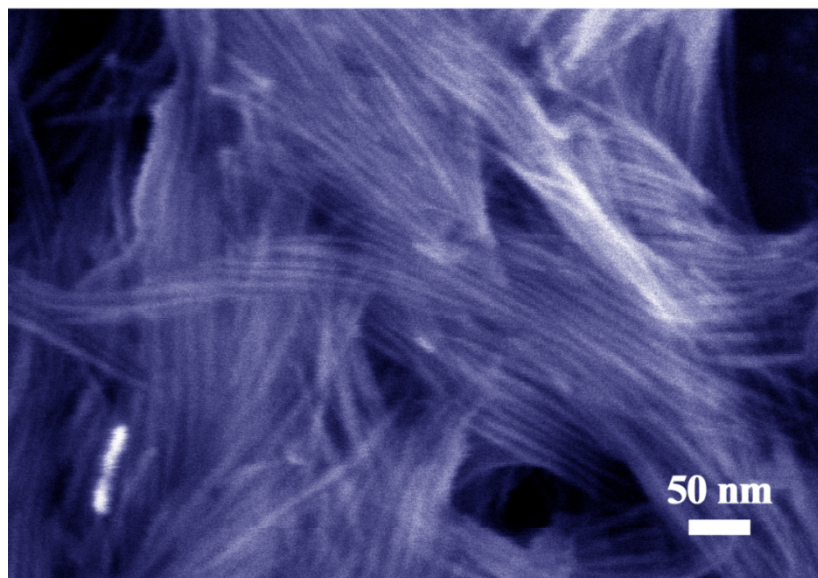

**Fig. S1** SEM images of the Co<sub>2</sub>P nanowires.

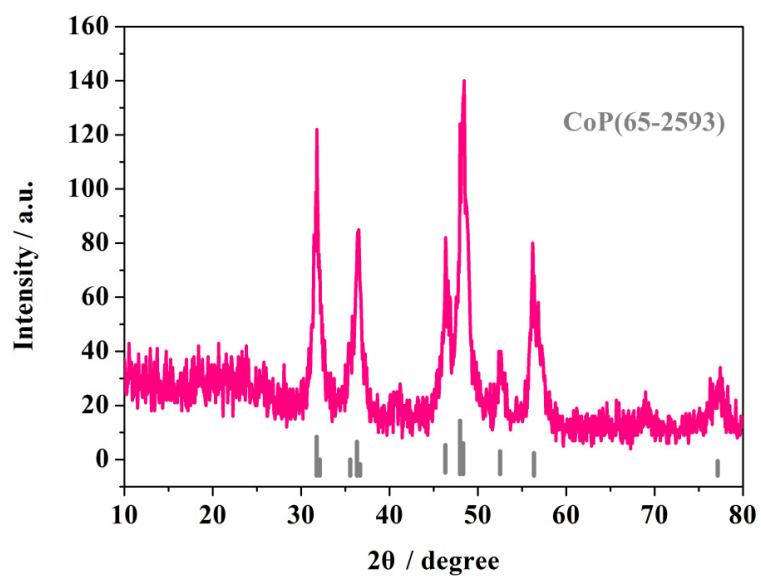

**Fig. S2** XRD pattern of the as-synthesized CoP NWs.

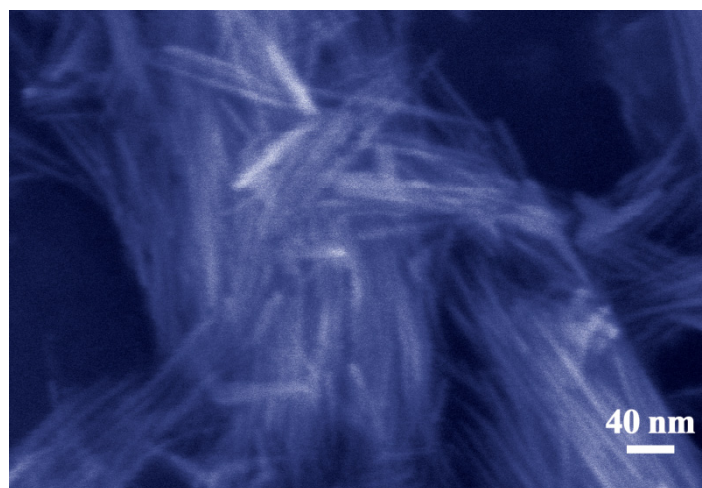

**Fig. S3** SEM image of CoP nanowires.

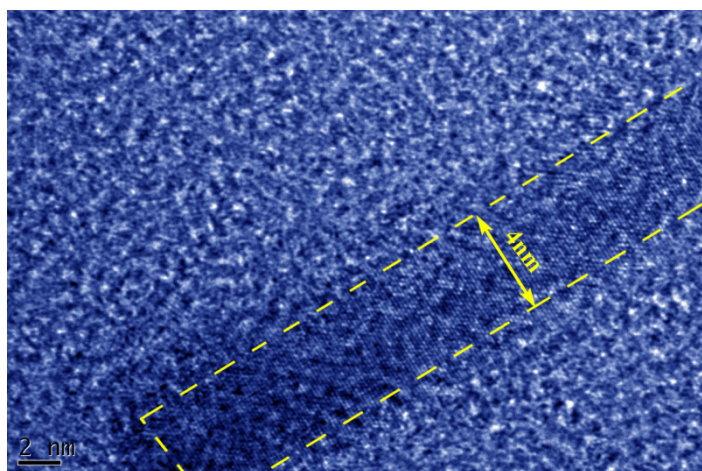

**Fig. S4** HRTEM images of CoP nanowire.

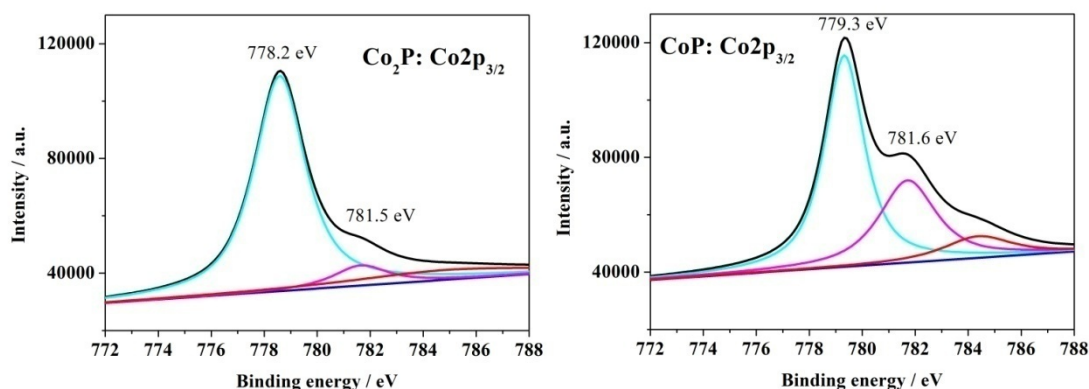

**Fig. S5** the deconvoluted XPS spectra for Co  $2p_{3/2}$  of  $\text{Co}_2\text{P}$  (left) and  $\text{CoP}$  (right).

**Table S1** Charges of cobalt in different catalysts calculated by the method reported from the ref.5.

| catalyst              | charges of Co |
|-----------------------|---------------|
| CoP                   | +0.7          |
| $\text{Co}_2\text{P}$ | +0.3          |
| bulk Co-P film        | +2            |

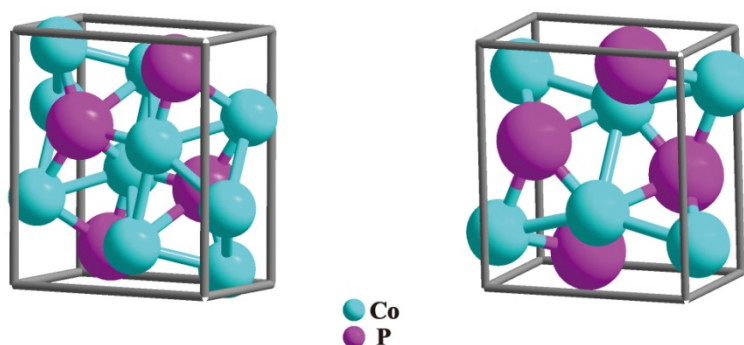

**Fig. S6** The crystal structures of  $\text{Co}_2\text{P}$  (left) and  $\text{CoP}$  (right) described as ball-and-stick model. Cobalt atoms (blue) are much more in the  $\text{Co}_2\text{P}$  than phosphorous atoms (purple). Especially, many Co atoms occupy the positions at the edge and surface.

## Elemental analysis:

**Table S2** XRF survey of the Co<sub>2</sub>P nanowires.

| Element | Content<br>(atomic)<br>% |
|---------|--------------------------|
| Co      | 36.509                   |
| P       | 18.532                   |
| O       | 44.959                   |

**Table S3** XRF survey of the CoP nanowires.

| Element | Content<br>(atomic)<br>% |
|---------|--------------------------|
| Co      | 29.584                   |
| P       | 28.831                   |
| O       | 41.585                   |

As for the purity of the sample, we carried out the overall element analysis by XRF to determine the atomic ratio of Co / P. The results display: Co / P = 23.5 % / 12.0 % = 1.96 (Co<sub>2</sub>P); Co / P = 19.6 % / 19.8 % = 0.99 (CoP). The XRF analysis demonstrates a near value of the stoichiometric ratio for both Co<sub>2</sub>P and CoP, which indicates the sample we prepared is indeed the cobalt phosphide with little impurities. By the way, the powder sample was loaded on the FTO glass for the XRF testing, so the result shows high oxygen concentration in the sample.

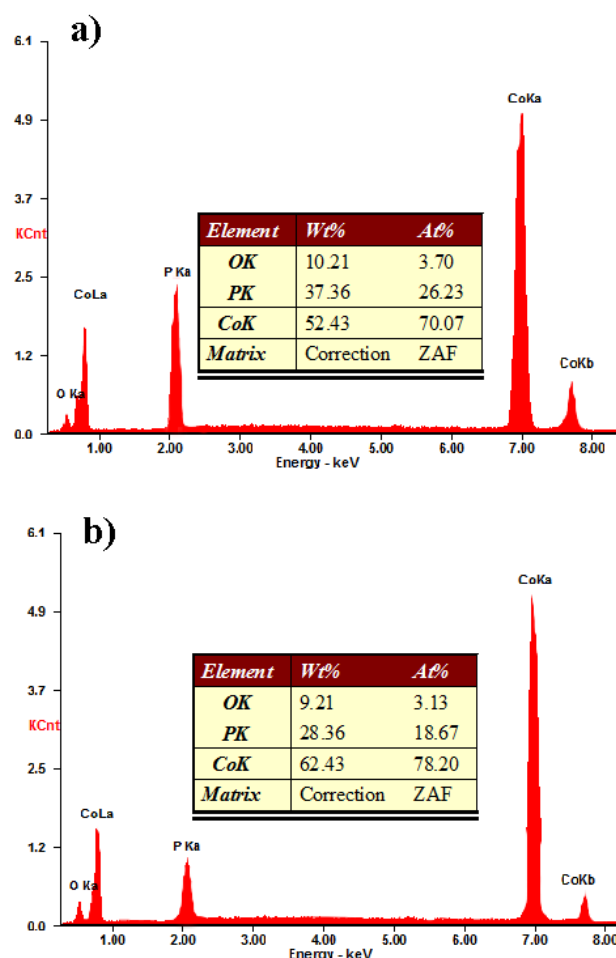

**Fig. S7** EDX spectra and corresponding element compositions of the a) CoP NWs and b) Co<sub>2</sub>P NWs.

The results reveal the phosphide degree of the two cobalt phosphide is different. The reason could be found from the formation mechanism of the TOP method. Firstly, the metal cation ( $\text{Co}^{2+}$ ) was reduced to the metallic state ( $\text{Co}^0$  cluster) by the oleic acid at  $\sim 300^\circ\text{C}$ .<sup>1</sup> Afterwards, when the temperature was increased to  $\sim 380^\circ\text{C}$ , the TOP which bound with the cobalt was decomposed as well as generated the cobalt phosphide from the surface to the inner. The head-product was  $\text{Co}_2\text{P}$  because of the lower phosphorous needed. While the reaction was continuous, the  $\text{Co}_2\text{P}$  would undergo the deep phosphide process together with TOP to form CoP.<sup>6</sup> Thus we could observe from the XRF and EDX results the CoP with higher phosphide degree than  $\text{Co}_2\text{P}$ .

## Characterizations of bulk Co-P film:

We then carried out the characterizations of the bulk Co-P film directly grown on Co foil. From the XRD pattern in Fig. S8, the phases of film are identified as the  $\text{CoP}_4$  and  $\text{Co}_2\text{P}_2\text{O}_7$ . XPS spectra of Co 2p and P 2p in Fig. S9 demonstrate the charged state of the Co-P film, which is apparently different from the  $\text{Co}_2\text{P}$  and CoP NWs. The peaks of Co 2p at 781.9 and 798.5 eV and the corresponding satellite peaks are assigned to the Co(II). And the peak of P 2p also reveals the presence of phosphate. Because XPS is a superficial analysis that usually captures the information near the surface of the material (5 ~ 10 nm), the cobalt phosphate is majorly formed on the surface. In addition, the EDX spectrum exhibits the elemental ratio of the bulk Co-P film on the cobalt foil.

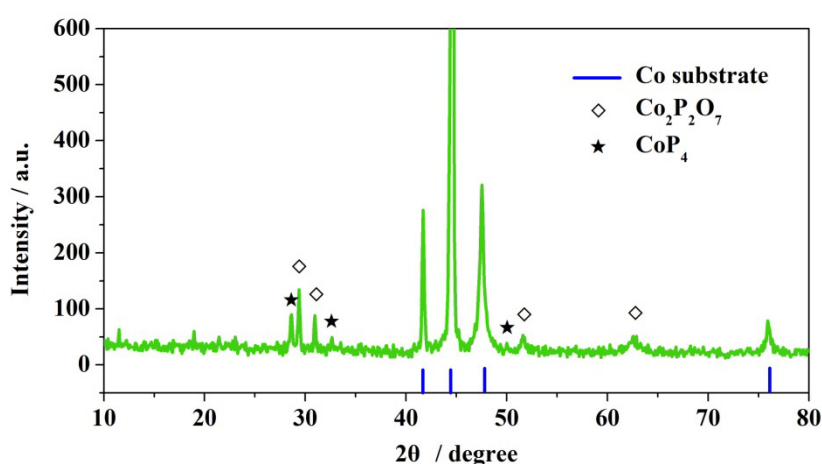

Fig. S8 XRD pattern of the bulk Co-P film directly grown on cobalt foil.

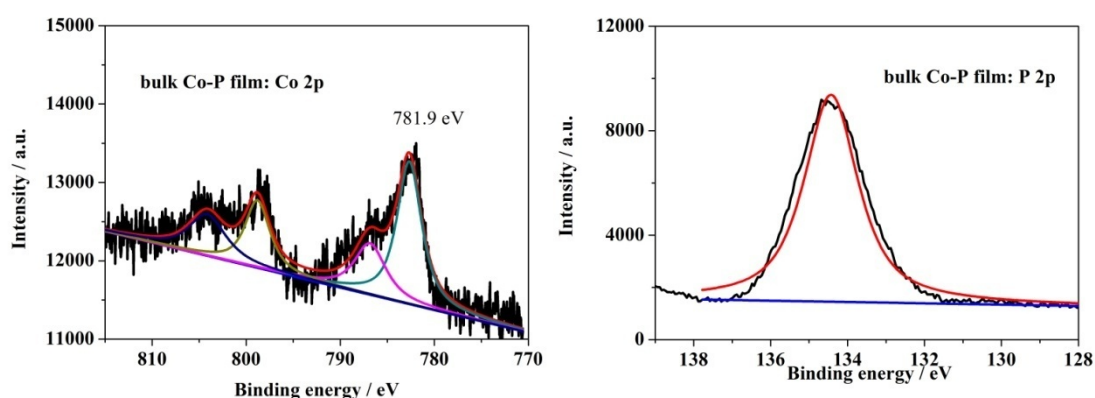

Fig. S9 XPS spectra of Co 2p (left) and P 2p (right).



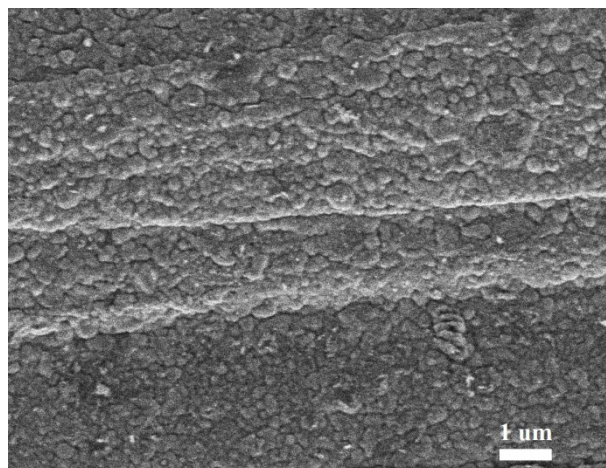

**Fig. S10** SEM image of the bulk Co-P film.

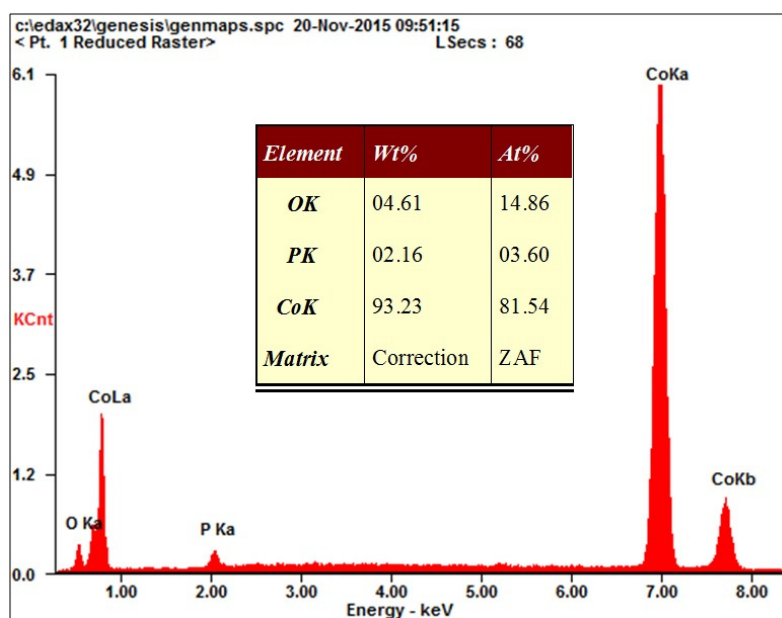

**Fig. S11** EDX spectrum and element analysis of bulk Co-P film.

### Additional electrochemical measurements:

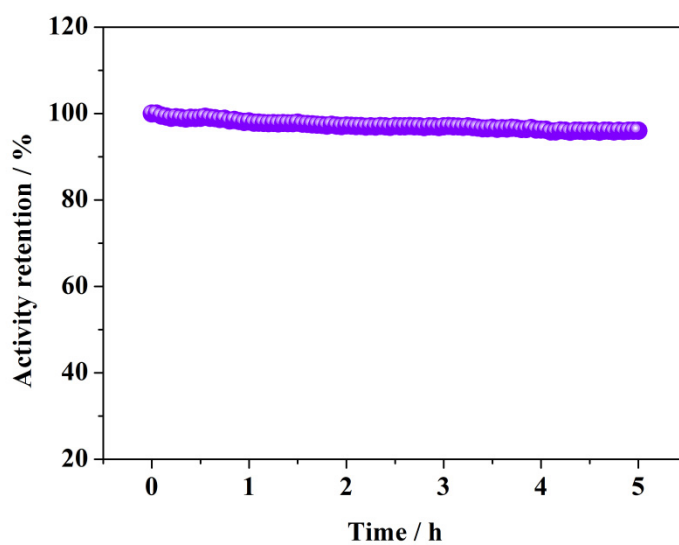

**Fig. S12** The long-term stability of the Co<sub>2</sub>P NWs for HER in 0.5 M H<sub>2</sub>SO<sub>4</sub>.

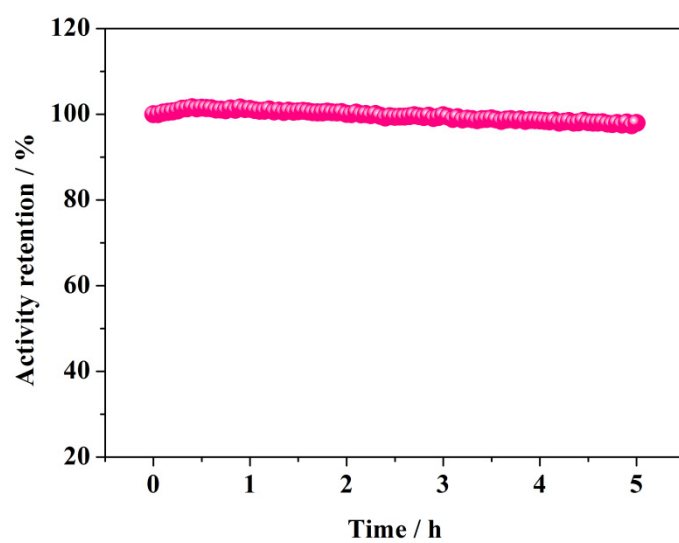

**Fig. S13** The long-term stability of the Co<sub>2</sub>P NWs for OER in 1 M KOH.

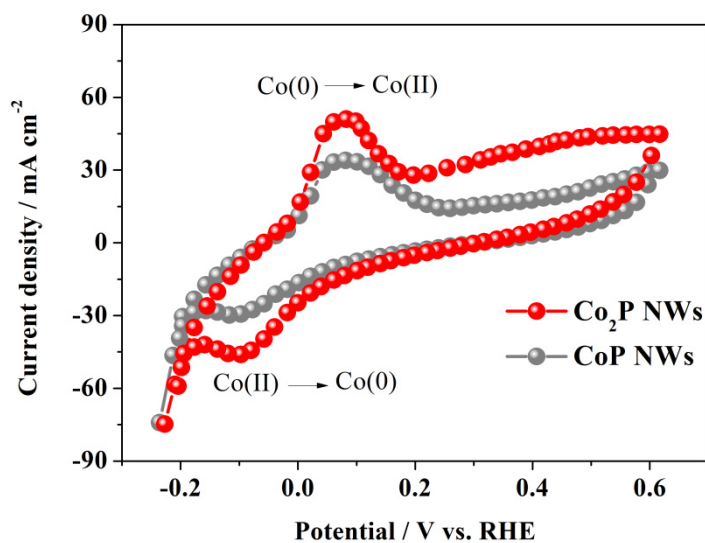

**Fig. S14** CVs in 1 M KOH with a Ni foam as the catalyst loading.

A pair of redox peaks are corresponding the electrochemical reaction for the cobalt phosphide in both  $\text{Co}_2\text{P}$  and  $\text{CoP}$ .<sup>7</sup>

anodic peak:  $\text{Co}_2\text{P} + 2\text{OH}^- \rightarrow \text{Co}(\text{OH})_2 + \text{Co} + \text{P} + 2\text{e}^-$  (1<sup>st</sup> cycle)

or  $\text{Co} + 2\text{OH}^- \rightarrow \text{Co}(\text{OH})_2 + 2\text{e}^-$

cathodic peak:  $\text{Co}(\text{OH})_2 + 2\text{e}^- \rightarrow \text{Co} + 2\text{OH}^-$

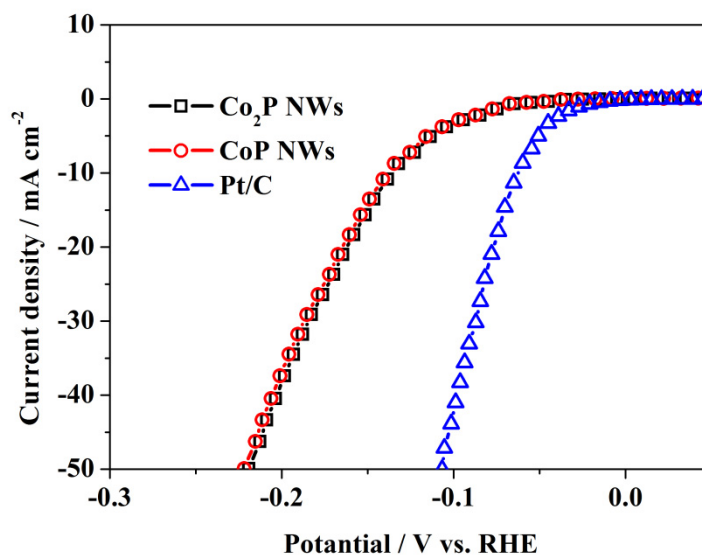

**Fig. S15** Hydrogen evolution in 1 M KOH for the  $\text{Co}_2\text{P}$  NWs,  $\text{CoP}$  NWs and Pt/C.

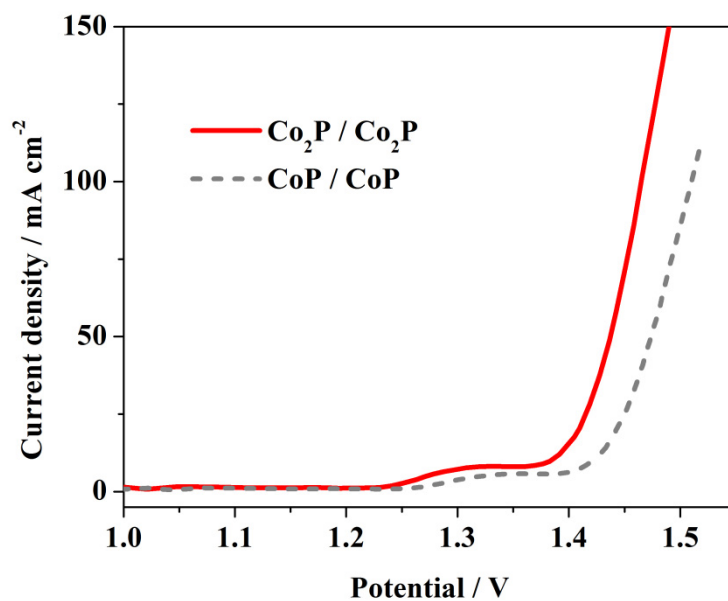

**Fig. S16** Polarization curves of the two-electrode configuration by using Co<sub>2</sub>P / Co<sub>2</sub>P and CoP / CoP as anode / cathode in 1 M KOH at 65 °C.

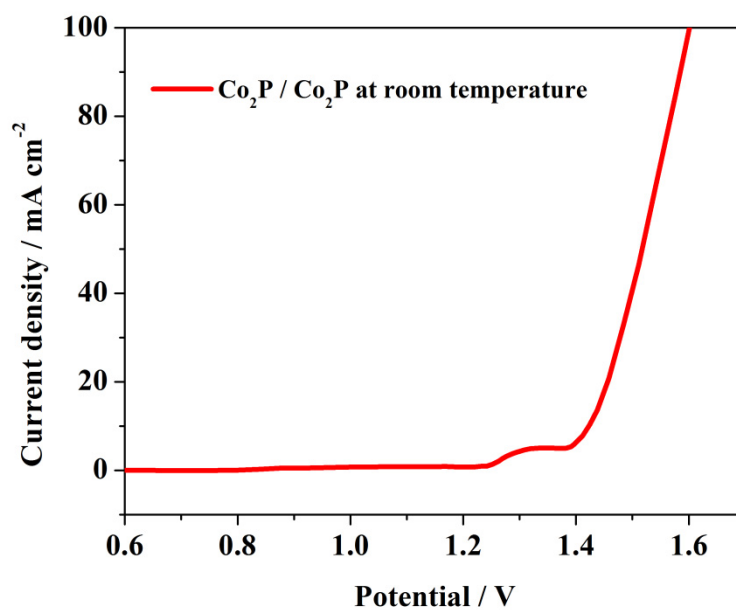

**Fig. S17** Polarization curves of the two-electrode configuration by using Co<sub>2</sub>P / Co<sub>2</sub>P at room temperature.

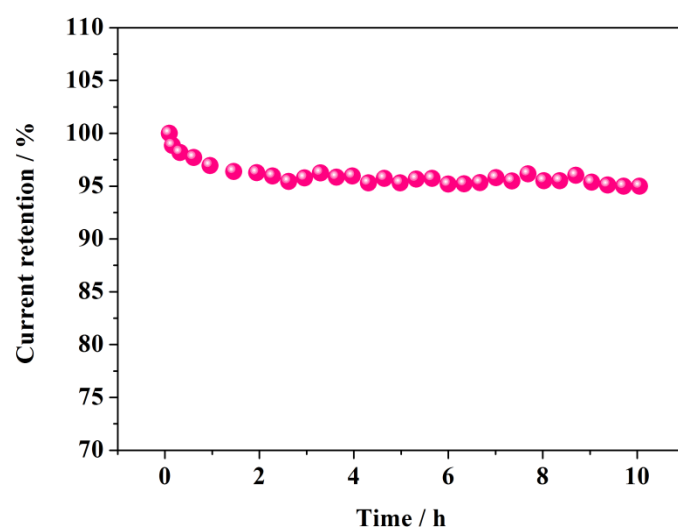

**Fig. S18** The stability of the two-electrode configuration based on Co<sub>2</sub>P NWs as both anode and cathode for alkaline water splitting. Cell voltage : 1.45 V, temperature: 65 °C, electrolyte : 1 M KOH.

## Additional characterizations of the catalyst after OER:

**Fig. S19** XPS survey spectra and **Table S4** corresponding elemental contents on the near-surface region (< 10 nm depth) of the anode (Co<sub>2</sub>P) before and after CV scanning.

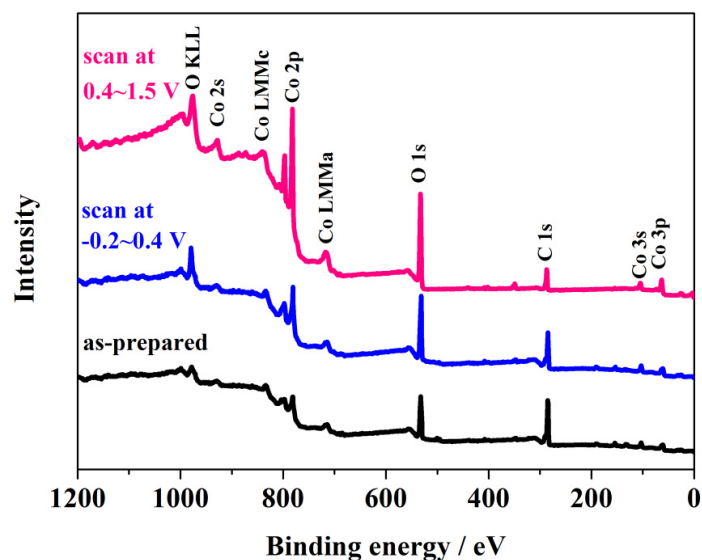

as-prepared:

| element | Atom Conc. % | Mass Conc. % |
|---------|--------------|--------------|
| Co      | 27.9         | 54.3         |
| P       | 15.6         | 15.9         |
| O       | 56.5         | 29.8         |

scan at -0.2 ~ 0.4 V:

| element | Atom Conc. % | Mass Conc. % |
|---------|--------------|--------------|
| Co      | 18.0         | 43.3         |
| P       | 5.3          | 6.7          |
| O       | 76.7         | 50.0         |

scan at 0.4 ~ 1.5 V:

| element | Atom Conc. % | Mass Conc. % |
|---------|--------------|--------------|
| Co      | 8.02         | 24.09        |
| P       | 1.37         | 2.08         |
| O       | 90.61        | 73.83        |

The increase of oxygen reveals the Co(OH)<sub>2</sub> and CoO<sub>x</sub> generated on the surface at the different potential window.

**Fig. S20** HRTEM images of the  $\text{Co}_2\text{P}$  nanowire after electrocatalysis (OER) in 1 M KOH.

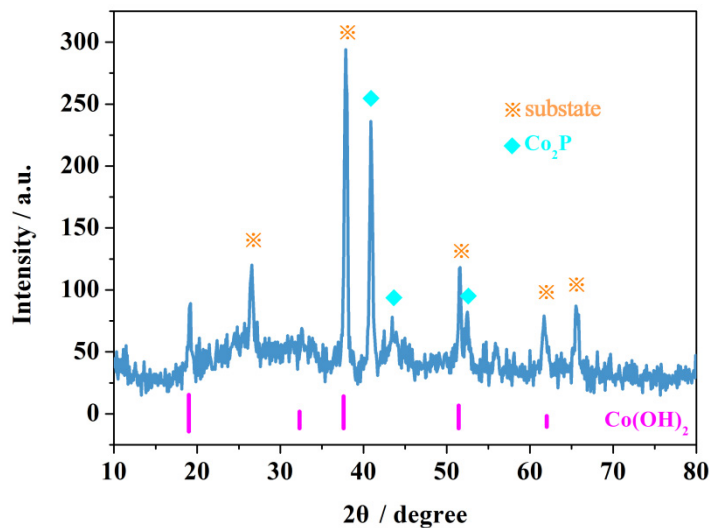

**Fig. S20** XRD pattern of the  $\text{Co}_2\text{P}$  after the CV scanning between -0.2 V and 0.4 V for 30 cycles; the ball-stick model shows the schematic structure of the cobalt oxo/hydroxide unit connecting with a phosphate group.

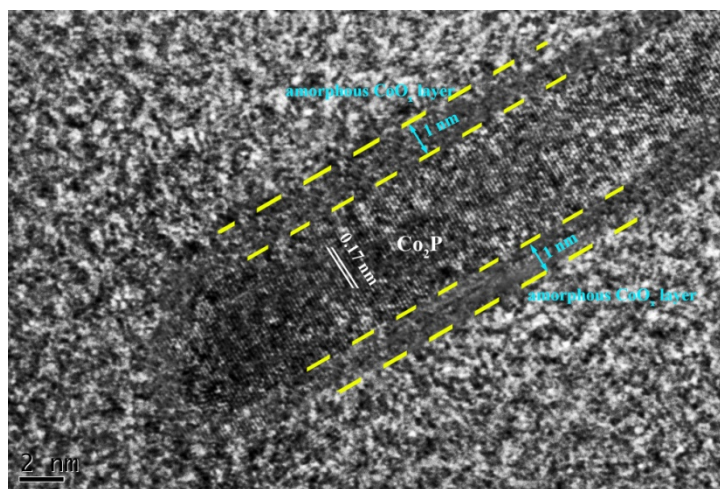

**Fig. S21** HRTEM images of the  $\text{Co}_2\text{P}$  nanowire after electrocatalysis (OER) in 1 M KOH.

**Table S5** Comparisons of the various HER catalysts in acidic electrolyte according to the reports and this paper.

| catalyst                                            | $\eta_{\text{onset}}$<br>(mV) | $\eta_{j=10 \text{ mA cm}^{-2}}$<br>(mV) | $\eta_{j=20 \text{ mA cm}^{-2}}$<br>(mV) | Tafel<br>slope<br>(mV<br>$\text{dec}^{-1}$ ) | substrate           | catalyst<br>loading<br>(mg<br>$\text{cm}^{-2}$ ) | reference |
|-----------------------------------------------------|-------------------------------|------------------------------------------|------------------------------------------|----------------------------------------------|---------------------|--------------------------------------------------|-----------|
| Ni <sub>2</sub> P                                   | -                             | 117                                      | 130                                      | 46                                           | Ti foil             | 1                                                | 8         |
| CoP                                                 | 38                            | 67                                       | 100                                      | 51                                           | carbon<br>cloth     | 0.92                                             | 9         |
| MoP                                                 | 50                            | 135                                      | 167                                      | 54                                           | GCE                 | 0.86                                             | 10        |
| Cu <sub>3</sub> P                                   | 62                            | 143                                      | -                                        | 67                                           | Cu foam             | 15.2                                             | 11        |
| MoS <sub>2</sub> /rGO                               | 100                           | 154                                      | 176                                      | 41                                           | GCE                 | 0.28                                             | 12        |
| CoSe <sub>2</sub>                                   |                               | 231                                      | -                                        | 42                                           | GCE                 | 0.037                                            | 13        |
| Fe-WCN                                              | 100                           | 220                                      | -                                        | 47                                           | GCE                 | 0.4                                              | 14        |
| Co <sub>9</sub> S <sub>8</sub><br>/MoS <sub>2</sub> | 64                            | 190                                      | -                                        | 110                                          | carbon<br>nanofiber | 0.212                                            | 15        |
| CoP NWs                                             | 30                            | 89                                       | 113                                      | 41                                           | GCE                 | 0.17                                             | this work |
| Co <sub>2</sub> P NWs                               | 33                            | 95                                       | 120                                      | 45                                           | GCE                 | 0.17                                             | this work |



**Table S6** Comparisons of the various OER catalysts in alkaline electrolyte according to the reports and this paper.

| catalyst                                  | electrolyte | $\eta_{j=10 \text{ mA cm}^{-2}}$<br>(V) | $\eta_{j=20 \text{ mA cm}^{-2}}$<br>(V) | Tafel slope<br>(mV dec <sup>-1</sup> ) | substrate                                      | catalyst<br>loading<br>(mg cm <sup>-2</sup> ) | reference |
|-------------------------------------------|-------------|-----------------------------------------|-----------------------------------------|----------------------------------------|------------------------------------------------|-----------------------------------------------|-----------|
| Ni <sub>2</sub> P                         | 1 M KOH     | 290                                     | 310                                     | 59                                     | GCE                                            | 0.14                                          | 16        |
| CoP/C                                     | 0.1 M KOH   | 360                                     | 390                                     | 66                                     | GCE                                            | 0.4                                           | 17        |
| Fe-doped<br>NiO                           | 1M KOH      | 290                                     | 320                                     | 54                                     | quartz<br>crystal<br>microbalance<br>electrode | 0.0225                                        | 18        |
| CoSe <sub>2</sub>                         | 0.1 M KOH   | 320                                     | 360                                     | 44                                     | GCE                                            | 0.142                                         | 19        |
| reduced<br>Co <sub>3</sub> O <sub>4</sub> | 1 M KOH     | 410                                     | 450                                     | 72                                     | GCE                                            | 0.136                                         | 20        |
| NiFe<br>LDH/NGF                           | 0.1 M KOH   | 190                                     | -                                       | 110                                    | carbon<br>nanofiber                            | 0.25                                          | 21        |
| CoP NWs                                   | 1 M KOH     | 320                                     | 360                                     | 64                                     | GCE                                            | 0.17                                          | this work |
| Co <sub>2</sub> P NWs                     | 1 M KOH     | 260                                     | 290                                     | 52                                     | GCE                                            | 0.17                                          | this work |

**Table S7** Comparisons of the two-electrode configuration performance according to the reports and this paper.

| electrode                                    | electrolyte | $U_{j=10 \text{ mA cm}^{-2}}$<br>(V) | $U_{j=100 \text{ mA cm}^{-2}}$<br>(V) | temperature<br>(°C) | substrate | reference |
|----------------------------------------------|-------------|--------------------------------------|---------------------------------------|---------------------|-----------|-----------|
| Ni <sub>2</sub> P/ Ni <sub>2</sub> P<br>NPs  | 1 M KOH     | 1.64                                 | -                                     | R.T. <sup>a</sup>   | Ni foam   | 16        |
| NiO-Ni                                       |             | 1.43                                 | 1.57                                  | R.T.                |           |           |
| CNT/NiFe<br>LDH                              | 1 M KOH     | 1.40                                 | 1.45                                  | 60                  | Ni foam   | 22        |
| NiSe/NiSe<br>NWs                             | 1 M KOH     | 1.63                                 | -                                     | R.T.                | Ni foam   | 23        |
| CoP/CoP<br>nanorods                          | 1 M KOH     | 1.62                                 | -                                     | R.T.                | Ni foam   | 24        |
| Co-P/Co-P<br>film                            | 1 M KOH     | 1.64                                 | 1.75                                  | R.T.                | Cu foil   | 25        |
| Co <sub>2</sub> P / Co <sub>2</sub> P<br>NWs | 1 M KOH     | 1.44<br>1.38                         | 1.60<br>1.46                          | R.T.<br>60          | Ni foam   | this work |

<sup>a</sup> R.T.: room temperature

## References:

1. A. E. Henkes and R. E. Schaak, *Chem. Mater.*, 2007, **19**, 4234-4242.
2. S. Y. Zhang, E. Y. Ye, S. H. Liu, S. H. Lim, S. Y. Tee, Z. L. Dong and M. Y. Han, *Adv. Mater.*, 2012, **24**, 4369-4375.
3. J. F. Callejas, C. G. Read, E. J. Popczun, J. M. McEnaney and R. E. Schaak, *Chem. Mater.*, 2015, **27**, 3769-3774.
4. S. J. Clark, M. D. Segall, C. J. Pickard, P. J. Hasnip, M. J. Probert, K. Refson and M. C. Payne., *Z. Kristallogr.*, 2005, **220**, 567-570.
5. A. P. Grosvenor, S. D. Wik, R. G. Cavell and A. Mar, *Inorg. Chem.*, 2005, **44**, 8988-8998.
6. D. Yang, J. X. Zhu, X. H. Rui, H. T. Tan, R. Cai, H. E. Hoster, D. Y. W. Yu, H. H. Hng and Q. Y. Yan, *ACS Appl. Mat. Interfaces*, 2013, **5**, 1093-1099.
7. W. X. Peng, L. F. Jiao, Q. N. Huan, L. Li, J. Q. Yang, Q. Q. Zhao, Q. H. Wang, H. M. Du, G. Liu, Y. C. Si, Y. J. Wang and H. T. Yuan, *J. Alloys Compd.*, 2012, **511**, 198-201.
8. E. J. Popczun, J. R. McKone, C. G. Read, A. J. Biacchi, A. M. Wilttrout, N. S. Lewis and R. E. Schaak, *J. Am. Chem. Soc.*, 2013, **135**, 9267-9270.
9. J. Q. Tian, Q. Liu, A. M. Asiri and X. P. Sun, *J. Am. Chem. Soc.*, 2014, **136**, 7587-7590.
10. P. Xiao, M. A. Sk, L. Thia, X. M. Ge, R. J. Lim, J. Y. Wang, K. H. Lim and X. Wang, *Energy Environ. Sci.*, 2014, **7**, 2624-2629.
11. J. Q. Tian, Q. Liu, N. Y. Cheng, A. M. Asiri and X. P. Sun, *Angew. Chem. Int. Ed.*, 2014, **53**, 9577-9581.
12. Y. Li, H. Wang, L. Xie, Y. Liang, G. Hong and H. Dai, *J. Am. Chem. Soc.*, 2011, **133**, 7296-7299.
13. D. Kong, J. J. Cha, H. Wang, H. R. Lee and Y. Cui, *Energy Environ. Sci.*, 2013, **6**, 3553-3558.

14. Y. Zhao, K. Kamiya, K. Hashimoto and S. Nakanishi, *Angew. Chem. Int. Ed.*, 2013, **52**, 13638-13641.
15. H. Zhu, J. Zhang, R. Yanzhang, M. Du, Q. Wang, G. Gao, J. Wu, G. Wu, M. Zhang, B. Liu, J. Yao and X. Zhang, *Adv. Mater.*, 2015, **27**, 4752-4759.
16. L. A. Stern, L. G. Feng, F. Song and X. L. Hu, *Energy Environ. Sci.*, 2015, **8**, 2347-2351.
17. J. Ryu, N. Jung, J. H. Jang, H.-J. Kim and S. J. Yoo, *ACS Catal.*, 2015, **5**, 4066-4074.
18. K. Fominykh, P. Chernev, I. Zaharieva, J. Sicklinger, G. Stefanic, M. Dobliger, A. Muller, A. Pokharel, S. Bocklein, C. Scheu, T. Bein and D. Fattakhova-Rohlfing, *ACS Nano*, 2015, **9**, 5180-5188.
19. Y. W. Liu, H. Cheng, M. J. Lyu, S. J. Fan, Q. H. Liu, W. S. Zhang, Y. D. Zhi, C. M. Wang, C. Xiao, S. Q. Wei, B. J. Ye and Y. Xie, *J. Am. Chem. Soc.*, 2014, **136**, 15670-15675.
20. Y. C. Wang, T. Zhou, K. Jiang, P. M. Da, Z. Peng, J. Tang, B. A. Kong, W. B. Cai, Z. Q. Yang and G. F. Zheng, *Adv. Energy Mater.*, 2014, **4**, 1400696.
21. C. Tang, H. S. Wang, H. F. Wang, Q. Zhang, G. L. Tian, J. Q. Nie and F. Wei, *Adv. Mater.*, 2015, **27**, 4516-4522.
22. M. Gong, W. Zhou, M. C. Tsai, J. G. Zhou, M. Y. Guan, M. C. Lin, B. Zhang, Y. F. Hu, D. Y. Wang, J. Yang, S. J. Pennycook, B. J. Hwang and H. J. Dai, *Nat. Commun.*, 2014, **5**, 4695-4700.
23. C. Tang, N. Y. Cheng, Z. H. Pu, W. Xing and X. P. Sun, *Angew. Chem. Int. Ed.*, 2015, **54**, 9351-9355.
24. Y.-P. Zhu, Y.-P. Liu, T.-Z. Ren and Z.-Y. Yuan, *Adv. Funct. Mater.*, 2015, 10.1002/adfm.201503666.
25. N. Jiang, B. You, M. L. Sheng and Y. J. Sun, *Angew. Chem. Int. Ed.*, 2015, **54**, 6251-6254.
